# Supplementary material
Source: PubMed Central journal article supplement (PMC4846402)
Supplement: 10-1055-s-0035-1558101-sup_gf975.pdf [file 10-1055-s-0035-1558101-sup_gf975.pdf]

# Vergleich konservativer und operativer Therapiekonzepte der Labiänsynechie präpubertaler Mädchen

## Comparison of Conservative and Surgical Therapy Concepts for Synechia of the Labia in Pre-Pubertal Girls

Autoren

S. Bussen, A. Eckert, U. Schmidt, M. Sütterlin

Institut

Department of Obstetrics and Gynecology, University Hospital Mannheim, Mannheim

### Schlüsselwörter

- Labienadhäsionen
- Kindergynäkologie
- Vulvovaginitis

### Key words

- labial adhesions
- paediatric gynaecology
- vulvovaginitis

### Zusammenfassung

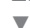

**Fragestellung:** Ziel dieser Untersuchung war es, den primären und sekundären Therapieerfolg unterschiedlicher Therapieschemata zur Behandlung einer Labiänsynechie präpubertaler Mädchen zu evaluieren.

**Material und Methodik:** Retrospektiv wurden die Behandlungsverläufe von 47 präpubertalen Mädchen analysiert, die zwischen Februar 2007 und Februar 2013 wegen einer Labiänsynechie in der kindergynäkologischen Spezialprechstunde einer Universitätsfrauenklinik behandelt wurden und bei denen Informationen über den weiteren Krankheitsverlauf über einen Zeitraum von mindestens 6 Monaten nach Therapieende verfügbar waren. 23 dieser Kinder wurden mit einer topischen Estrioltherapie behandelt (Behandlungsgruppe A). Bei 24 Kindern wurde eine manuelle Separation der adhären Labia minora durchgeführt (Behandlungsgruppe B). Die statistische Auswertung erfolgte mithilfe des  $\chi^2$ -Tests, des exakten Tests nach Fisher und des U-Tests nach Mann-Whitney.

**Ergebnisse:** Bei 18 der 23 (80%) der Mädchen der Behandlungsgruppe A führte die alleinige topische Estrioltherapie zu einer Lösung der Synechie. Fünf dieser 23 Kinder (20%) mussten sekundär mit einer manuellen Separation behandelt werden. Alle Mädchen mit ausbleibendem Therapieerfolg waren  $\geq 5$  Jahre. Bei allen 24 Mädchen (100%) der Behandlungsgruppe B konnte die primäre manuelle Separation erfolgreich durchgeführt werden. Die Rezidivrate nach  $\geq 6$  Monaten unterschied sich zwischen den beiden Behandlungsgruppen bei identischer Nachbehandlung nicht (Behandlungsgruppe A: 34%, Behandlungsgruppe B: 33%,  $\chi^2$ -test:  $p = 0,853$ ). 16 der 17 Rezidive traten  $\geq 3$  Monate nach Therapieende auf.

**Schlussfolgerung:** Unsere Ergebnisse zeigen, dass bei Kindern  $< 5$  Jahren eine 4-wöchige topische Therapie mit Estriol eine erfolversprechende,

### Abstract

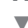

**Introduction:** The aim of this study was to evaluate the primary and secondary therapeutic successes of different therapy schemes for the treatment of synechia of the labia in pre-pubertal girls.

**Materials and Methods:** The treatment courses of 47 pre-pubertal girls who were treated between February 2007 and February 2013 in the special outpatient clinic for paediatric gynaecology of a department for gynaecology at a German university hospital and for whom information on the course of the disease was available for at least the six months following end of the treatment. 23 of these children were treated with a topical estriol therapy (treatment group A). For 24 of the girls a manual separation of the adhering labia minora was undertaken (treatment group B). Statistical evaluation was performed using the  $\chi^2$  test, Fischer's exact test and the Mann-Whitney U test.

**Results:** For 18 of the 23 (80%) girls in treatment group A topical estriol therapy alone led to a resolution of the synechia. Five of these 23 children (20%) required a secondary manual separation. All girls for whom treatment was not successful were under 5 years of age. For all 24 girls (100%) of treatment group B the primary manual separation was performed with success. The recurrence rates after  $\geq 6$  months in cases with identical after-care did not differ between the two treatment groups (treatment group A: 34%, treatment group B: 33%,  $\chi^2$  test:  $p = 0,853$ ). 16 of the 17 recurrences occurred  $\geq 3$  months after the end of the therapy.

**Conclusion:** Our results show that for children  $< 5$  years of age a 4-week topical therapy with estriol is a promising therapy option for synechia of the labia that is less of a burden for the family situation. Especially for girls  $\geq 5$  years of age, primary therapy fails in up to 20% of the cases. Primary manual separation represents a more effective

eingereicht 1.4.2015  
revidiert 12.7.2015  
akzeptiert 25.8.2015

### Bibliografie

**DOI** <http://dx.doi.org/10.1055/s-0035-1558101>  
Geburtsh Frauenheilk 2016; 76:  
1–6 © Georg Thieme Verlag KG  
Stuttgart · New York ·  
ISSN 0016-5751

### Korrespondenzadresse

**Dr. Stefanie Bussen**  
University Hospital Mannheim  
Department of Obstetrics and  
Gynecology  
Theodor-Kutzer-Ufer 1–3  
68167 Mannheim  
stefanie.bussen@  
universitaetsmedizin-  
mannheim.net

die familiäre Situation wenig belastende Therapieoption zur Behandlung der Labiänsynechie darstellt. Besonders bei älteren Mädchen  $\geq 5$  Jahren kommt es in bis zu 20% zu einem primären Therapieversagen. Die primäre manuelle Separation stellt eine wirkungsvollere Therapieoption dar. Unabhängig von der durchgeführten Behandlung muss mit einem Rezidiv nach  $\geq 3$  Monaten in einem Drittel der behandelten Mädchen gerechnet werden.

## Einleitung

Unter einer Labiänsynechie versteht man die oberflächliche Adhäsion der Labia minora an ihren medialen Rändern. Neben dem Begriff der Labiänsynechie wird in der deutschen Literatur auch Vulvasynechie verwendet, da neben der Verklebung der kleinen Labien auch oft auch eine Verklebung der Vulvaränder erfolgt (im Englischen: Labial adhesion, labial agglutination, labial fusion and synechia vulvae) [1]. Betroffen sind vor allem Mädchen in der hormonellen Ruhephase mit einem besonderen Schwerpunkt im Alter zwischen 2 und 4 Jahren [1]. Die Inzidenzrate wird mit 1,8–3,5% [2] angegeben. Eine Ausnahme stellt die Studie von McCann et al. dar, der bei präpubertalen, asymptomatischen Mädchen eine Inzidenz von 38,9% fand [3]. Ätiologisch geht man von einer primär entstehenden oberflächlichen Hautirritation in der physiologischen hormonellen Ruhephase aus [4], die ggf. auch in Kombination mit oberflächlichen Vulvovaginitiden entsteht. Diese Entzündungen können altersabhängig unterschiedliche Ursachen haben wie eine bakterielle Infektion, eine Oxyureninfektion oder eine topische Dermatitis. Die häufigsten Ursachen sind in einer unzureichenden oder häufiger zu intensiven Intimhygiene zu sehen durch eine Irritation der Haut durch übermäßige topische Applikation von Seifen, Schaumbädern, Sitzbädern oder anderen reizenden Substanzen sowie enger Kleidung. Auch eine falsche Defäkations- oder Miktionsstellung kann eine auslösende Ursache darstellen. Differenzialdiagnostisch muss ein Lichen sclerosus erwogen werden. Die oberflächliche Hautirritation auf der nicht östrogenisierten Schleimhaut führt bei den betroffenen Mädchen zu einer Reepithelialisierung in Verbindung mit der gegenüberliegenden, ebenfalls irritierten Labie und damit zu einer nicht vaskularisierten Verklebung. Histologisch besteht sie aus keratinisiertem geschichtetem Plattenepithel. Die Diagnose wird anhand des klinischen Untersuchungsbefunds gestellt. Typischerweise findet man eine hauchdünne, durchscheinende Membran, die den Introitus verschließt (● Abb. 1). Die Symptomatik hängt maßgeblich von der Ausprägung der Synechie ab. Diese kann auf einer Teilstrecke der Labia minora (ventral, dorsal, mittig) oder aber auf der kompletten Länge der Labia minora (komplette Labiänsynechie) auftreten. Je ausgeprägter die Verklebung auftritt, desto eher kommt es zu Beschwerden bei dem betroffenen Kind. In Folge der kompletten Labiänsynechie kann es bei windelfreien Kindern zu Harnträufeln kommen, das die lokale Entzündungsreaktion unterhält. Es wurden unterschiedliche Angaben zur Assoziation mit Harnwegsinfektionen (5–14%) und unspezifischen Bakteriurien (2–20%) publiziert [5]. Vereinzelt wurden Obstruktionen der ableitenden Harnwege beschrieben [6]. Der häufigste lokale Befund ist eine Vulvitis oder Vulvovaginitis. Die Kinder selbst äußern nur selten Beschwerden wie vaginales Brennen, Jucken oder Schmerzen im Zusammenhang mit der Miktions. Bei gering ausgeprägten Verwachsungen wird der Befund häufig zufällig im Rahmen einer Vorsorgeuntersuchung entdeckt, ohne dass Beschwerden vorliegen. Die Eltern zeigen sich häufig durch das Krankheitsbild verunsichert oder

therapeutic option. Irrespective of the treatment applied, a recurrence after  $\geq 3$  must be expected in one-third of the treated girls.

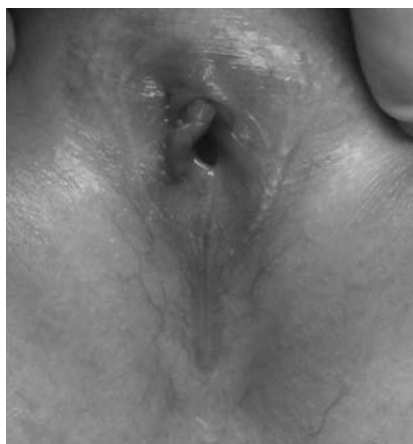

**Abb. 1** Klinisches Bild einer typischen präpubertalen Labiänsynechie bei einem 5-jährigen Mädchen.

verängstigt und müssen aktiv in den Behandlungsprozess eingebunden werden.

Die Behandlungsempfehlungen zur Labiänsynechie differieren je nach Literaturstelle. Einige Arbeitsgruppen empfehlen die alleinige Applikation von 0,1%iger Estriolsalbe ohne manuelle Maßnahmen [1]. Ein Hormonmangel konnte jedoch bislang in Studien nicht nachgewiesen werden [7]. Andere Autoren favorisieren die topische Estrogenvorbehandlung mit anschließender manueller Lösung [8,9] oder eine primäre operative Separation [10] bei Misserfolg der Estrogentherapie. Alternativ existieren Behandlungsschemata mit topischen Kortikosteroiden (Betamethason 0,05%) [11,12] oder 0,1% Gentamycincreme [13]. Andere Arbeitsgruppen empfehlen im Sinne einer raschen Problemlösung die sofortige manuelle Labienseparation [14] bzw. operative Trennung der Labien [15].

Zu beachten sind die möglichen Nebenwirkungen der aufgeführten Therapien. Als mögliche Nebenwirkungen einer Therapie werden Rötungen, Brennen der Vulva und Labienpigmentierungen [16] erwähnt. Selten wurden eine prämatüre Thelarche, Adrenarche, uterine Blutungen oder eine psychische Traumatisierung beschrieben [17]. Derzeit existieren keine Daten zu der Fragestellung, ob eine der Behandlungsmethoden einen Einfluss auf die konsekutive Entwicklung eines genitalen Lichen sclerosus hat.

Ziel unserer Untersuchung war es, in einer retrospektiven Untersuchung den therapeutischen Effekt sowie das Rezidivrisiko in Abhängigkeit der angewandten Therapie und des Lebensalters des behandelten Kindes zu analysieren.

## Material und Methodik

### Patientinnenkollektiv

Zwischen Februar 2007 bis Februar 2013 wurden 64 Mädchen zur Behandlung einer Labiänsynechie in die kindergynäkologische Spezialprechstunde einer Universitätsfrauenklinik über-

wiesen. Von 47 Kindern lagen Informationen über den weiteren Krankheitsverlauf über einen Zeitraum von mindestens 6 Monaten nach Therapieende durch Kontrolluntersuchungen oder Befunde des weiterbehandelnden Kinderarztes vor.

Keines der in die Untersuchung eingeschlossenen Mädchen litt unter einer rezidivierenden Labiänsynechie oder einer dermatologischen Erkrankung mit anogenitaler Manifestation. In **Abb. 2** ist die Altersverteilung der kleinen Patientinnen bei Erstvorstellung aufgelistet.

30 der Mädchen (64%) waren jünger als 3 Jahre, 12 (25%) zwischen 3 und 5 Jahren, 5 (11%) zwischen 6 und 10 Jahren (Streuweite: 0–10 Jahre, Median: 1,9 Jahre). Die entsprechenden Charakteristiken der 17 Mädchen, von denen keine Krankheitsverläufe vorlagen, waren vergleichbar (64% [n = 11] < 3 Jahre, 24% [n = 4] 3–5 Jahre, 2 [12%] 6–10 Jahre; Streubreite: 0–10 Jahre, Median: 1,8 Jahre).

Die Überweisung der Mädchen folgte aus den in **Tab. 1** aufgeführten Gründen.

Bei allen Kindern wurde eine standardisierte Fremdanamnese erhoben. Die auswärts bereits erfolgten Vorbehandlungen wurden eruiert. 96% aller Mädchen (45 von 47 Kindern) waren über einen variablen Zeitraum von den zuweisenden Kollegen/Kolleginnen mit Estriolsalben vorbehandelt worden. Bei 29 Mädchen (64%) war ein einmaliger, bei den übrigen 16 Kindern (36%) waren multiple Vorbehandlungszyklen erfolgt.

Mittels standardisierter kindergynäkologischer Untersuchung durch eine Fachärztin wurde der Befund validiert und eine Klassifizierung in komplette ( $\geq 50\%$  des Introitus verlegt) bzw. partielle Labiänsynechie (< 50%) vorgenommen. Bei 43 der 47 Kinder (92%) wurde eine komplette, bei den übrigen 4 Mädchen (8%) eine partielle dorsale Labiänsynechie diagnostiziert. Eine spezifische Vulvitis wurde mittels einer mikrobiologischen Abstrichdiagnostik ausgeschlossen.

### Therapiekonzept A und B

Es erfolgte eine ausführliche Aufklärung der Eltern über die alternativen Therapieoptionen:

#### Behandlungsoption A: topische Therapie mit Estriol

Den Kindern wurde eine Estriolcreme (Estriol 1 mg/g) verordnet (Oekolp®, Dr. Kade Pharma GmbH, Berlin, Deutschland), die über 4 Wochen 1-mal täglich zur Nacht durch die betreuende Person entsprechender der detaillierten Anweisung (Auftragen exakt an der Fusionsstelle, evtl. mithilfe eines Wattestäbchens unter leichten Druck und Traktion) aufgetragen werden sollte.

#### Behandlungsoption B: manuelle Labienseparation

Zur Vorbehandlung wurde den Kindern durch die Bezugsperson 60 min vor dem geplanten Eingriff Lidocain-Gel 2% (Xylocain® 2%, Fa. Astra Zeneca GmbH, Wedel, Deutschland) dünn im Genitalbereich appliziert. 30 min später erhielten die Kinder eine gewichtsadaptierte Prämedikation mit Midazolam 0,25 mg/kgKG (Midazolamsaft, 2 mg/ml, Fa. Ratiopharm, Ulm Deutschland) und Ibuprofen 10 mg/kgKG (Dolormin® für Kinder 2%, Fa. McNeil, Neuss, Deutschland). Zur manuellen Labienseparation wurde das Mädchen in der Regel auf dem Schoß der Bezugsperson in Rückenposition gelagert. Analog zur Traktionsmethode bei der kindergynäkologischen Untersuchung wurde die nicht epithelisierten Synechie vorsichtig angespannt und mit einem angefeuchteten Wattetupfer von ventral nach dorsal eröffnet. Diese Lösung benötigte 1–2 s. Zur Nachbehandlung wurden die Eltern angeleitet, über 10 d 2-mal tgl. eine Gentamycinsalbe 0,1%

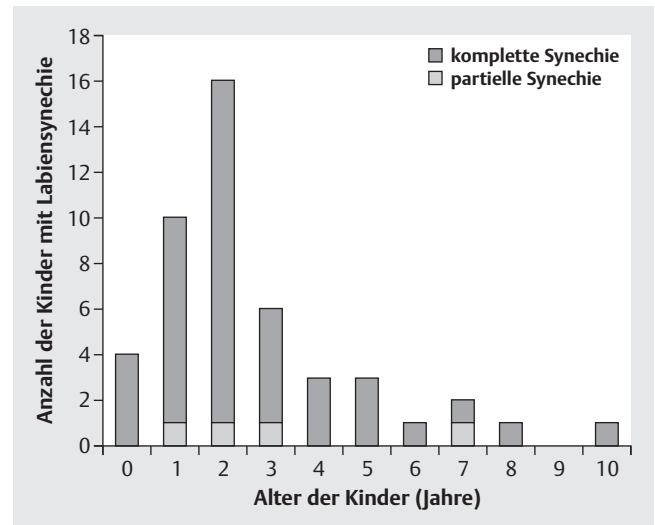

**Abb. 2** Altersverteilung der präpubertalen Mädchen mit Labiänsynechie bei Erstvorstellung (n = 47).

**Tab. 1** Überweisungsgrund der präpubertalen Mädchen mit Labiänsynechie (n = 47).

| Indikation zur Überweisung*                        | Anzahl<br>n (%) |
|----------------------------------------------------|-----------------|
| Zufallsbefund im Rahmen einer Vorsorgeuntersuchung | 21 (45)         |
| rezidivierende Rötung der Vulva                    | 14 (30)         |
| rezidivierende Vulvovaginitis                      | 9 (20)          |
| Harnträufeln                                       | 1 (2)           |
| V. a. Harnwegsinfekt                               | 2 (4)           |
| Schmerzen bei Miktion                              | 3 (6)           |
| verzögerte Miktion                                 | 1 (2)           |
| V. a. vesikourethraler Reflux                      | 1 (2)           |

\* Mehrfachnennungen möglich

(Infectogenta® 0,1%, Fa. Infectopharm GmbH, Heppenheim, Deutschland) zu applizieren.

23 Eltern wählten zunächst die Fortführung der Lokalthherapie (Behandlungsgruppe A). 24 Erziehungsberechtigte entschieden sich für die manuelle Labienseparation (Behandlungsgruppe B). Allen Eltern wurde das Vorgehen ausführlich erläutert und ein Merkblatt zur optimalen Intimhygiene ihrer Mädchen ausgehändigt. Begleitend wurde mehrfach täglich eine adstringierende Hautpflege auf Paraffinölbasis empfohlen (Deumavan®, Fa. Kaymogyn, Wiesbaden, Deutschland). Die Eltern wurden gebeten, 1-mal wöchentlich das kindliche Genitale zum frühzeitigen Erkennen eines etwaigen Rezidivs zu inspizieren.

#### Kindergynäkologische Befundung

Bei der Kontrolluntersuchung nach 4 Wochen wurde der Behandlungserfolg durch dasselbe ärztliche Team beurteilt. Die Kinder der Behandlungsgruppe A, bei denen durch die topische Therapie kein Erfolg erzielt werden konnte, wurde entsprechend der Behandlungsgruppe B sekundär mittels manueller Separation behandelt.

Die Zufriedenheit der Eltern mit der gewählten Behandlung wurde mit einem Fragebogen evaluiert.

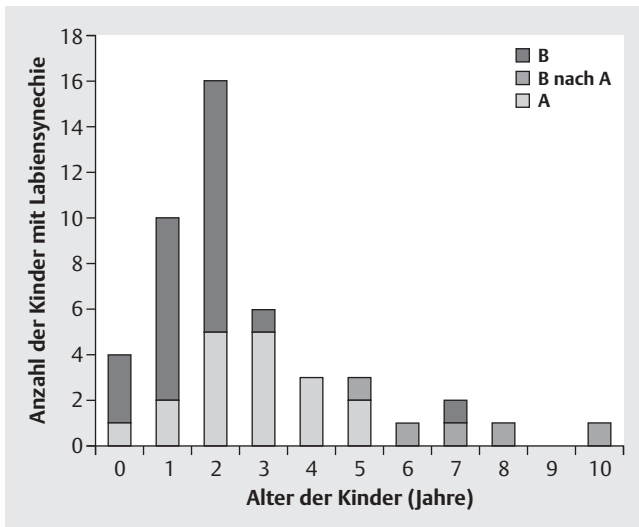

**Abb. 3** Altersverteilung in Bezug auf die Behandlungsgruppen der präpubertalen Mädchen mit Labialsynechie (n = 47).

Zur Beurteilung der Rezidivquote wurden die kindergynäkologischen Befunde der in die Studie eingeschlossenen 47 Mädchen nach Ablauf von mindestens 6 Monaten nach Therapieende ausgewertet. Die mittlere Nachbeobachtungszeit betrug im Median 20 Monate (Streuweite: 6–66 Monate).

### Statistische Auswertung

Nicht normalverteilte metrische Variable wurden als Median und Spannweite angegeben. Der Vergleich von nicht normalverteilten metrischen Variablen zwischen den beiden Gruppen erfolgte mithilfe des U-Tests nach Mann-Whitney. In Abhängigkeit von der minimal erwarteten Häufigkeit wurde zum Vergleich kategorialer Variablen in den beiden Altersgruppen der  $\chi^2$ -Test bzw. der exakte Test nach Fisher angewendet. Eine statistische Signifikanz wurde bei  $p < 0,05$  postuliert. Die Datenauswertung und Analyse erfolgte mithilfe der Statistiksoftware SPSS Statistics® (Version 17.0, SPSS Inc. Chicago, USA).

### Ergebnisse

Insgesamt wurden die Daten von 47 Mädchen, die im Zeitraum von Februar 2007 bis Februar 2013 erstmalig zur Behandlung einer Labialsynechie in die kindergynäkologische Spezialprechstunde überwiesen wurden, ausgewertet. 23 Kinder wurden primär topisch therapiert (Behandlungsgruppe A), davon wurden bei nach 4 Wochen ausbleibendem Therapieerfolg 5 Kinder sekundär mittels manueller Separation behandelt (Behandlungsgruppe B nach A). 24 Kinder erhielten auf Wunsch der Eltern primär eine manuelle Separation (Behandlungsgruppe B) (● **Tab. 2**).

● **Abb. 3** zeigt die Altersverteilung in Bezug auf die durchgeführte Behandlung der insges. 47 Mädchen. In der Altersgruppe der 2 Jahre alten und jüngeren Mädchen (n = 30) entschieden sich signifikant mehr Eltern (22 von 30 Eltern, 73%) für die primäre manuelle Separation als für die topische Therapie (8 von 30 Eltern, 27%,  $\chi^2$ -Test:  $p = 0,043$ ). Im Gegensatz dazu wählten die Eltern der 3- bis 5-jährigen Patientinnen (n = 12) überwiegend die topische Therapieoption (11 von 12 Eltern, 82%). Nur ein be-

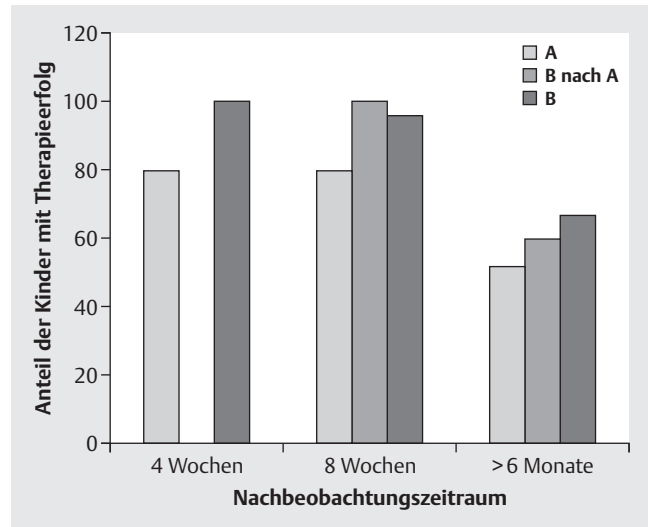

**Abb. 4** Therapieerfolge der präpubertalen Mädchen mit Labialsynechie (n = 47).

**Tab. 2** Behandlungsschemata der präpubertalen Mädchen mit Labialsynechie (n = 47).

|                     |                               | Anzahl der Mädchen |
|---------------------|-------------------------------|--------------------|
| Behandlungsoption A | Östrial-Lokaltherapie         | 23                 |
|                     | sekundäre manuelle Separation | 5                  |
| Behandlungsoption B | Primäre manuelle Separation   | 24                 |

troffenes Elternpaar (8%) entschied sich primär für die manuelle Separation (exakter Test nach Fisher:  $p = 0,032$ ). Ein vergleichbares Verhalten zeigten die Eltern der älteren Mädchen der Altersgruppe von 6 bis 10 Jahren (n = 5). Auch in diesem Kollektiv entschied sich nur ein Elternpaar (20%) für die primäre manuelle Therapie. Die anderen 4 Eltern wählten die topische Behandlungsoption (4 von 5 Eltern, 80%, exakter Test nach Fisher:  $p = 0,042$ ). Bei allen 24 mittels primärer manueller Separation behandelten Kindern konnte der Eingriff ohne Allgemeinnarkose innerhalb von 1–2 s komplikationslos und erfolgreich durchgeführt werden.

### Kindergynäkologischer Befund nach 4 Wochen

Bei der ersten Kontrolluntersuchung nach 4 Wochen war bei 18 der 23 Mädchen (80%) der Behandlungsgruppe A ein Behandlungserfolg im Sinne einer kompletten Synechielösung zu sehen. Alle 24 der mittels primärer manueller Separation therapierten Kinder waren rezidivfrei. Damit ließ sich durch die primäre manuelle Separation ein signifikant besserer Therapieerfolg erzielen ( $\chi^2$ -Test:  $p = 0,041$ ; ● **Abb. 4**, **Tab. 3**).

Die 5 erfolglos topisch therapierten Mädchen der Behandlungsgruppe A waren alle  $\geq 5$  Jahre (● **Abb. 3**). Drei dieser Mädchen zeigten einen ausgedehnten Befund, sodass die Indikation zur manuellen Separation in Allgemeinnarkose gestellt werden musste. Es konnte bei jedem Mädchen eine komplette Synechie-separation erreicht werden.

**Tab. 3** Therapieerfolg der unterschiedlichen Behandlungsschemata der präpubertalen Mädchen mit Labiänsynechie (n = 47).

| Behandlungsschema                                            | Nachbeobachtungsdauer (Monate) |              |              |
|--------------------------------------------------------------|--------------------------------|--------------|--------------|
|                                                              | 1                              | 2            | > 6 Monate   |
| A (topische Therapie)                                        | 18/23<br>80%                   | 18/23<br>80% | 12/18<br>66% |
| B nach A (sekundäre manuelle Lösung nach topischer Therapie) |                                | 5/5<br>100%  | 3/5<br>60%   |
| B (primäre manuelle Separation)                              | 24/24<br>100%                  | 23/24<br>96% | 16/24<br>67% |

### Kindergynäkologischer Befund nach 8 Wochen

Bei der 2. Kontrolluntersuchung nach 8 Wochen (Abb. 4, Tab. 3) zeigte ein 2-jähriges Mädchen aus der mittels primärer manueller Separation behandelten Therapiegruppe ein Frührezidiv. Alle anderen Kinder der unterschiedlichen Behandlungsgruppen waren zu diesem Zeitpunkt rezidivfrei.

### Kindergynäkologischer Befund nach > 6 Monaten

Im weiteren Verlauf wurden bei einem Nachbeobachtungszeitraum von mindestens 6 Monaten in der Behandlungsgruppe A 6 Rezidive und in der Behandlungsgruppe B weitere 7 Rezidive diagnostiziert. Die Dauer bis zum Auftreten eines Rezidivs betrug in Behandlungsgruppe A im Median 5,1 Monate (Streubreite: 4–21 Monate), in Behandlungsgruppe B 6,7 Monate (Streubreite: 3–17 Monate). Damit zeigte sich kein signifikanter Unterschied zwischen der Häufigkeit eingetretener Rezidive (Behandlungsgruppe A: 34% vs. Behandlungsgruppe B: 33%,  $\chi^2$ -Test:  $p = 0,853$ ) oder dem Zeitintervall bis zum Eintreten des Rezidivs zwischen den beiden Therapiegruppen (U-Test nach Mann-Whitney:  $p = 0,715$ ).

Die Zufriedenheit der Eltern mit der durchgeführten Behandlung unterschied sich zwischen den Therapiekonzepten. Während alle Eltern der Behandlung Behandlungsgruppen A sowie B nach A (insges. 23 Eltern) auch rückblickend mit ihrer Entscheidung zufrieden waren, gaben 3 der 24 Eltern (13%) der Behandlungsgruppe B an, dass sie sich nicht wieder für das gewählte Therapiekonzept entscheiden würden, da sie dieses Therapieregime als zu belastend für ihr Kind und die Familie erlebt hätten (exakter Test nach Fisher:  $p = 0,065$ ).

### Diskussion

Da die Therapieempfehlungen in der einschlägigen Literatur zur Behandlung von Labiänsynechien im Kindesalter nicht einheitlich sind, haben wir die Eltern nach ausführlicher Aufklärung über Befund sowie konservative und invasive Behandlungsoptionen (topische Estrioltherapie, primäre bzw. sekundäre manuelle Labienseparation) in die Therapieentscheidung eingebunden. Die Entscheidungsfindung der Eltern wird von vielfältigen Faktoren beeinflusst. Dies betrifft sowohl kindliche als auch parenterale Faktoren. Statistisch signifikant war die Abhängigkeit vom kindlichen Alter. Während sich fast  $\frac{3}{4}$  der Eltern, deren Kinder 2 Jahre und jünger waren, für die in einmaliger Therapiesitzung durchführbare primäre manuelle Separation entschieden, trafen nur  $\frac{1}{5}$  der Elternpaare der 3 bis 5-jährigen bzw. 6- bis 10-jährigen Mädchen diese Entscheidung. Möglicherweise fühlten sich die Eltern der kleinen Wickelkinder von der eigenständigen Durch-

führung der Lokaltherapie überfordert oder befürchteten, ihr Kind akzidentiell zu verletzen oder ihm Schmerzen zuzufügen. In der Literatur gibt es eine ausgeprägte Kontroverse über die Art der Behandlung der präpubertalen Labiänsynechie. Von zahlreichen Autoren wird die Applikation estriolhaltiger Externa empfohlen [1,2,16]. Die Erfolgsrate variiert zwischen 50 und 90% [11,12]. Zu diesen Daten passt die in unserer Behandlungsgruppe A der über 4 Wochen topisch mit 1% Estriolcreme therapierten Mädchen zwischen 4 Monaten und 10 Jahren, beobachtete Heilungsrate von 80%. Da die meisten (96%) der therapierten Mädchen bereits mit einem vergleichbaren Therapiezyklus vorbehandelt waren, erscheinen mindestens 2 Behandlungen sinnvoll. Wir fanden einen Zusammenhang zwischen Alter der Mädchen und Behandlungsergebnis, in dem Sinne, dass insbesondere die Synechien der Kindern, die zum Zeitpunkt der Behandlung älter als 5 Jahre waren, mit der topischen Hormontherapie häufig nicht erfolgreich behandelt werden konnten. Diese Patientinnen behandelten wir, wie die Arbeitsgruppen Anthuber et al. (2004) und Buck et al. (2010) in ihren Veröffentlichungen empfahlen, mit einer sekundären manuellen Separation erfolgreich [8,9]. Die Mädchen der Behandlungsgruppe B wurden analog den Empfehlungen der Autoren Thibaud et al. (2003) und Watanabe et al. (2010) mittels primärer manueller Separation therapiert [14,15]. Es konnte bei allen Kindern eine Synechielösung erreicht werden. Damit war der sofortige Therapieerfolg signifikant besser als jener der Lokaltherapie mit Estriolcreme.

Bezüglich einer mechanischen Lösung finden sich in der Literatur wegen der potenziellen Traumatisierung der Mädchen auch kritische Würdigungen [11,12]. Es finden sich jedoch durchaus Arbeiten, in denen das Verfahren wegen des zügigen Therapieerfolgs und der hohen Erfolgsrate als Therapie der Wahl empfohlen werden [15,16]. Häufig dominiert bei den Eltern die Angst vor möglichen kindlichen Schmerzen bei der manuellen Labienlösung trotz der angebotenen analgetischen Prämedikation. Jedoch muss bei Indikationsstellung zur topischen Estrioltherapie auch bedacht und darüber aufgeklärt werden, dass die alleinige Behandlung mit Östrogencreme langwierig ist, eine hohe Compliance aufseiten des Kindes und der Eltern fordert und möglicherweise von den oben aufgeführten Nebenwirkungen begleitet sein kann.

Fast  $\frac{3}{4}$  der behandelten Mädchen zeigten keine Symptome (45%) infolge der Labiänsynechie oder wiesen nur eine intermittierend auftretende asymptomatische Vulvarötung (30%) auf. Da mit zunehmendem Lebensalter die Synechien eine deutlich intensivere Adhärenz zeigen, sollte bei erstmaliger Diagnosestellung im Schulalter auch bei asymptomatischen Kindern zügig eine Therapie eingeleitet werden. Eine rechtzeitige Behandlung kann ein Fortschreiten der Verklebung mit Narbenbildung im Kontaktbereich der beiden Labien verhindern und damit das betroffene Mädchen vor einer möglichen operativen Intervention in Allgemeinanästhesie schützen. Auch in dem von uns untersuchten Kollektiv waren alle 3 Mädchen, die aufgrund des ausgedehnten Befunds zur manuellen Separation einer Allgemeinnarkose bedurften, 5 Jahre und älter.

Beide Behandlungskollektive zeigten eine Rezidivrate von  $\frac{1}{3}$  nach mindestens 6 Monaten (Behandlungsgruppe A: 34% vs. Behandlungsgruppe B: 33%). Diese Daten passen zu publizierten Rezidivraten von bis zu 41% unabhängig von dem Behandlungskonzept, das primär Anwendung gefunden hatte [1,2,6]. Unsere Untersuchung kann die von Myers et al. (2006) publizierten Daten nicht bestätigen, die ein erhöhtes Rezidivrisiko bei den mit primärer Separation behandelten Kindern zeigten [11].

Die beobachteten Synechierezidive traten mit einer Ausnahme > 3 Monate nach Therapieende auf. Dieser zeitliche Verlauf muss insbesondere bei der Aufklärung der Eltern bez. des Zeitrahmens der konsequent durchzuführenden optimalen Genitalhygiene Berücksichtigung finden.

Unsere Untersuchungen zeigen, dass die Zufriedenheit der Eltern mit einer zunächst topischen Therapie, an die sich nachfolgend bei Therapieversagen nach 4 Wochen eine sekundäre manuelle Separation anschloss, größer war, wenn auch nicht signifikant, als wenn primär eine manuelle Separation durchgeführt wurde. Aus den erhobenen Daten sowie aus unserer Erfahrung im Umgang mit den Mädchen und ihren Eltern steht vor allem ein ausführliches Gespräch mit den Eltern und je nach Alter auch mit dem Mädchen bei der Erstvorstellung im Vordergrund. Die Aufklärung der Eltern über die Ätiologie und die Komplikationen des Krankheitsbilds sowie die Aufklärung über die möglichen Therapiemöglichkeiten und altersentsprechend zu empfehlenden Hygienemaßnahmen ist dringend erforderlich, um die Eltern in die Behandlung einzubinden und so das Rezidivrisiko zu minimieren.

### Fazit für die Praxis

▼ Aufgrund der erhobenen Daten und unter Berücksichtigung der publizierten Studien erscheint es aus Sicht der Autoren empfehlenswert, eine symptomatische Labiensynechie mit 2 bis zu 4-wöchigen Behandlungszyklen einer topischen Estrioltherapie zu behandeln. Die Eltern sollten über eine Erfolgsquote dieses Therapiekonzepts von 80% aufgeklärt werden. Circa ⅓ der Kinder benötigen sekundär eine manuelle Separation. Unter den Therapieversagern finden sich insbesondere Mädchen mit einem Lebensalter  $\geq 5$  Jahren. Misserfolge der Therapie können durch eine fehlende Kontinuität der Behandlung durch die betreuende Person entstehen. Alternativ sollte die primäre manuelle Separation angeboten werden, durch die in einer einmaligen Therapiesitzung eine Lösung erreicht werden kann. Zu berücksichtigen ist in der Beratung die niedrigere Akzeptanz dieser Behandlungskonzepts durch die Bezugspersonen des Kindes. Unabhängig von der Art der Primärtherapie kommt es bei einem Drittel der Mädchen nach  $\geq 3$  Monaten zu einem Labiensynechierezidiv. Aufgrund der geringen Progressionstendenz bestehender Labienadhäsionen bei Belassen der Synechien und einer hohen Spontanremission bis zum Erreichen der Menarche sollte eine Therapieindikation bei Mädchen mit einer asymptomatischen Labien-

synechie, insbesondere im Kind- und Vorschulalter, sowie bei Eintreten eines Rezidivs zurückhaltend gestellt werden.

### Interessenkonflikt

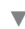

Die Autoren erklären, dass sie keine finanziellen Verbindungen mit einer für den Artikel relevanten Firma haben.

### Literatur

- 1 Heinz M. Symptome und Erkrankungen des äußeren Genitale und der Brust bei Mädchen. *Gynäkologe* 2011; 44: 452–462
- 2 Van Eyk N, Allen L, Giesbrecht E et al. Pediatric vulvovaginal disorders: a diagnostic approach and review of the literature. *J Obstet Gynaecol Can* 2009; 31: 850–862
- 3 Mc Cann J, Wells R, Voris S et al. Genital findings in prepubertal girls selected for nonabuse: a decriptive study. *Pediatrics* 1990; 86: 428–439
- 4 Todd IP. Labial adhesions in children. *Br Med J* 1946; 2: 13–14
- 5 Leung AK, Robson WL. Labial fusion and asymptomatic bacteruria. *Eur J Pediatr* 1993; 152: 250–251
- 6 Weissenrieder N, Lochmüller EM. Rezidivierende Vulvasynechien – Differenzierte Therapieoptionen. *Korasion* 2013; 28: 19–26
- 7 Caglar MK. Serum estradiol levels in infants with and without labial adhesions: the role of estrogen in the etiology and treatment. *Pediatr Dermatol* 2007; 24: 373–375
- 8 Anthuber S, Anthuber C, Hepp H. Operative Korrektur genitaler Fehlbildungen. *Gynäkologe* 2004; 37: 822–829
- 9 Buck G, Kreienberg R. Kinder- und Jugendgynäkologie: Basiswissen für die Frauenarztpraxis. *Gynäkologe* 2010; 43: 499–516
- 10 Nurzia MJ, Eickhorst KM, Ankem MK et al. The surgical treatment of labial adhesions in pre-pubertal girls. *J Pediatr Adolesc Gynecol* 2003; 16: 21–23
- 11 Eroglu E, Yip M, Oktar T et al. How should we treat prepubertal labial adhesions? Retrospective comparison of topical treatments: estrogen only, betamethasone only, and combination estrogen and betamethasone. *J Pediatr Adolesc Gynecol* 2011; 24: 389–392
- 12 Mayoglou L, Dulabon L, Martin-Alguacil N. Success of treatment modalities for labial fusion: a retrospective evaluation of topical and surgical treatments. *J Pediatr Adolesc Gynecol* 2009; 22: 247–250
- 13 Myers JB, Sorensen CM, Wisner BP et al. Betamethasone cream for the treatment of pre-pubertal labial adhesions. *J Pediatr Adolesc Gynecol* 2006; 19: 407–411
- 14 Watanabe T, Matsubara S, Fujinaga Y et al. Manual separation followed by local cleanliness for pediatric labial adhesion. *J Obstet Gynecol Res* 2010; 36: 667–670
- 15 Thibaud E, Duflos C. Plaidoyer pour l'enfant: le traitement de la coalescence des petites lèvres est inutile. *Arch Pediatr* 2003; 10: 465–466
- 16 Leung AK, Robson WL, Kao CP et al. Treatment of labial fusion with topical estrogen therapy. *Clin Pediatr* 2005; 44: 245–247
- 17 Schober J, Dulabon L, Martin-Alguacil N et al. Significance of topical estrogens to labial fusion and vaginal introital integrity. *J Pediatr Adolesc Gynecol* 2006; 19: 337–339
